# Supplementary material for: The association between coffee and caffeine consumption and renal function: insight from individual-level data, Mendelian randomization, and meta-analysis
Source: PubMed Central journal article supplement — Arch Med Sci. 2021 Dec 14;18(4):900–11. doi: 10.5114/aoms/144905 (PMC9266873; doi:10.5114/aoms/144905), 2021-12-14
Supplement: AMS-18-4-144905-s1.pdf [file AMS-18-4-144905-s1.pdf]

**Supplementary Table SI.** Summary results of the 5 genetic loci of coffee intake

| SNP       | Nearest gene | GX    | GX SE | EA | OA | EAF  |
|-----------|--------------|-------|-------|----|----|------|
| rs2472297 | CYP1A2       | 0.14  | 0.01  | T  | C  | 0.24 |
| rs4410790 | AHR          | -0.1  | 0.01  | T  | C  | 0.37 |
| rs7800944 | MLXIPL       | -0.5  | 0.01  | T  | C  | 0.72 |
| rs17685   | POR          | 0.07  | 0.01  | A  | G  | 0.29 |
| rs9902453 | EFCAB5       | -0.03 | 0.01  | A  | G  | 0.54 |

All of the coffee intake markers were associated at genome-wide significance ( $p < 5 \times 10^{-8}$ ). EA – effect allele, OA – other allele, EAF – effect allele frequency, GX – the per-allele effect on standard deviation units of coffee intake, GX SE – standard error of GX.

**Supplementary Table SII.** Full search terms and strategy for papers indexed in PubMed

| No. | Concept                             | Search terms                                                                                                                                                                                  |
|-----|-------------------------------------|-----------------------------------------------------------------------------------------------------------------------------------------------------------------------------------------------|
| 1   | Coffee                              | “coffee” [Mesh] OR “caffeine” [Mesh]                                                                                                                                                          |
| 2   | Renal function                      | chronic kidney disease [tiab] OR chronic kidney disease *[tiab] OR CKD[tiab]                                                                                                                  |
| 3   | Combination Exposure<br>And Outcome | #1 AND #2                                                                                                                                                                                     |
| 4   | Limit                               | Rats[Mesh:NoExp]) OR Mice[Mesh:NoExp]) OR rat[Title/Abstract]) OR rats[Title/Abstract]) OR mouse[Title/Abstract]) OR mice[Title/Abstract]) OR vivo[Title/Abstract]) OR vitro[Title/Abstract]) |
| 5   | Limit                               | #7 NOT #4                                                                                                                                                                                     |

### For Supplementary Table SIII:

#### NEWCASTLE–OTTAWA QUALITY ASSESSMENT SCALE COHORT STUDIES

Note: A study can be awarded a maximum of one star for each numbered item within the Selection and Outcome categories. A maximum of two stars can be given for Comparability.

##### Selection

- 1) Representativeness of the exposed cohort:
  - a) truly representative of the average *healthy adults* in the community ★
  - b) somewhat representative of the average *healthy adults* in the community ★
  - c) selected group of users *e.g. nurses, volunteers, vegetarian*
  - d) no description of the derivation of the cohort
- 2) Selection of the non-exposed cohort:
  - a) drawn from the same community as the exposed cohort ★
  - b) drawn from a different source
  - c) no description of the derivation of the non-exposed cohort
- 3) Ascertainment of exposure:
  - a) secure record (*e.g. 7 day food diary*) ★
  - b) structured interview/ $\geq 2$  *dietary recalls/diet history/ food frequency questionnaire validated for dairy components* ★
  - c) written self-report (*e.g. < 2 dietary recalls/non-validated food frequency questionnaire or not reported whether food frequency questionnaire was validated*)
  - d) no description
- 4) Demonstration that outcome of interest was not present at start of study:
  - a) yes ★
  - b) no

##### Comparability

- 1) Comparability of cohorts on the basis of the design or analysis:
  - a) study controls for *age, sex, smoking, total energy intake, and body mass index* ★
  - b) study controls for any additional factor (*e.g. physical activity, alcohol intake, family history of diabetes, dietary factors*) ★

##### Outcome

- 1) Assessment of outcome:
  - a) independent blind assessment (*e.g. clinical diagnosis/complete medical information available*). ★
  - b) record linkage/*medical record or validated self-report* ★
  - c) non-validated self-report
  - d) no description
- 2) Was follow-up long enough for outcomes to occur?
  - a) yes/ *follow up period for outcome of interest is 10 years or over* ★
  - b) no
- 3) Adequacy of follow-up of cohorts
  - a) complete follow-up – all subjects accounted for ★
  - b) subjects lost to follow-up unlikely to introduce bias – small number lost  $\leq 20\%$  follow-up, or description provided of those lost ★
  - c) follow-up rate  $< 80\%$  or no description of those lost
  - d) no statement

**Supplementary Table SIII.** Quality assessment of included cohort studies\*

| Studies             | Selection                                 |                                     |                             |                                       | Compa-rability                                                    |                        | Outcome                                       |                                    | Total score |
|---------------------|-------------------------------------------|-------------------------------------|-----------------------------|---------------------------------------|-------------------------------------------------------------------|------------------------|-----------------------------------------------|------------------------------------|-------------|
|                     | Repre-sentativeness of the exposed cohort | Selection of the non-exposed cohort | Ascer-tainment of expo-sure | Outcome not present at start of study | Compa-rability of co-horts on the basis of the design or analysis | Assess-ment of outcome | Fol-low-up long enough for out-comes to occur | Adequa-cy of fol-low-up of cohorts |             |
| Trovato (2010) [1]  | C                                         | A★                                  | B★                          | A★                                    | A★<br>B★                                                          | B★                     | A★                                            | B★                                 | 8           |
| Pham (2010) [2]     | C                                         | A★                                  | B★                          | A★                                    | B★<br>B★                                                          | B★                     | B★                                            | B★                                 | 7           |
| Nakajima (2010) [3] | C                                         | A★                                  | B★                          | A★                                    | A★<br>B★                                                          | B★                     | A★                                            | B★                                 | 8           |
| Kim (2013) [4]      | C                                         | A★                                  | B★                          | A★                                    | A★<br>B★                                                          | B★                     | A★                                            | B★                                 | 8           |
| Jhee (2018)         | C                                         | A★                                  | B★                          | A★                                    | A★<br>B★                                                          | B★                     | A★                                            | B★                                 | 8           |

\*The 6<sup>th</sup> study included in the systematic review is based on the results of the current NHANES analysis.

**Supplementary Table SIV.** Characteristics of the studies that were included in the meta-analysis

| Author, year and reference | Country, region/ cohort                                        | Coffee consumption measurement                        | Design          | Sample size | Definition of CKD                                                       | Main confounders                                                                                                                                                                                                                                                                                                  |
|----------------------------|----------------------------------------------------------------|-------------------------------------------------------|-----------------|-------------|-------------------------------------------------------------------------|-------------------------------------------------------------------------------------------------------------------------------------------------------------------------------------------------------------------------------------------------------------------------------------------------------------------|
| Trovato (2010) [1]         | Italy,                                                         | Interviewer-administered food frequency questionnaire | Cross-sectional | 221         | RRI > 0.65<br>Renal color Doppler echocardiography used to evaluate RRI | Hemoglobin, albumin, free-fat mass, hypertension, HOMA and renal insufficiency                                                                                                                                                                                                                                    |
| Pham (2010) [2]            | Japan,                                                         | Self-reported food frequency                          | Cross-sectional | 11,662      | GFR < 60 ml/min/1.73 m <sup>2</sup>                                     | None                                                                                                                                                                                                                                                                                                              |
| Nakajima (2010) [3]        | Japan,                                                         | Self-reported food frequency                          | Cross-sectional | 342         | GFR < 60 ml/min/1.73 m <sup>2</sup>                                     | Age, smoking, sex, tea consumption, alcohol drinking, medications, BMI, blood pressure, LDL, TAG, HDL, fasting glucose, proteinuria                                                                                                                                                                               |
| Kim (2013) [4]             | Korean, Korea National Health and Nutrition Examination Survey | Household interview with self-reported questionnaire  | Cross-sectional | 2,673       | GFR < 60 ml/min/1.73 m <sup>2</sup>                                     | Age, alcohol intake, total energy intake, hypertension, antidiyslipidemic drug use, BMI, diabetes                                                                                                                                                                                                                 |
| Jhee (2018) [5]            | Korean, Korean Genome and Epidemiology Study                   | food frequency questionnaire                          | Cohort          | 8,717       | GFR < 60 ml/min/1.73 m <sup>2</sup>                                     | Age, sex, BMI, mean arterial pressure, smoking status, alcohol status, income, CRP, hemoglobin, albumin, total cholesterol, eGFR, and proteinuria, mean arterial pressure, history of hypertension and cardiovascular events, HbA <sub>1c</sub> and history of diabetes, daily intake amount of tea and chocolate |
| Mazidi (2019)              | USA, National Health and Nutrition Examination Surveys         | 24 h recall                                           | Cross-sectional | 18,436      | GFR < 60 ml/min/1.73 m <sup>2</sup>                                     | Age, sex, race, income to poverty, alcohol intake, energy intake, smoking, BMI, HTN, TG and DM                                                                                                                                                                                                                    |

eGFR – estimated glomerular filtration rate, BMI – body mass index, SBP – systolic blood pressure, DBP – diastolic blood pressure, PP – pulse pressure, FFM – fat-free mass, FM – fat mass, ECW – extracellular water, ICW – intracellular water, BUN – blood urea nitrogen, GFR – glomerular filtration rate, HDL – high-density lipoprotein, LDL – low-density lipoprotein, RRI – renal resistive index, TG – triglyceride, HOMA-IR – homeostatic model assessment of insulin resistance.

### References for Supplementary Tables SIII and SIV

1. Trovato GM, Pirri C, Martines GF, Trovato F, Catalano D. Coffee, nutritional status, and renal artery resistive index. *Renal Fail* 2010; 32: 1137-47.
2. Pham NM, Yoshida D, Morita M, et al. The relation of coffee consumption to serum uric acid in Japanese men and women aged 49-76 years. *J Nutr Metabol* 2010; 2010: 930757.
3. Nakajima K, Hirose K, Ebata M, Morita K, Munakata H. Association between habitual coffee consumption and normal or increased estimated glomerular filtration rate in apparently healthy adults. *Br J Nutr* 2010; 103: 149-52.
4. Kim BH, Park YS, Noh HM, Sung JS, Lee JK. Association between coffee consumption and renal impairment in Korean women with and without diabetes: analysis of the Fourth Korea National Health and Nutrition Examination Survey in 2008. *Korean J Fam Med* 2013; 34: 265-715.
5. Jhee JH, Nam KH, An SY, et al. Effects of coffee intake on incident chronic kidney disease: a community-based prospective cohort study. *Am J Med* 2018; 131: 1482-90.e3.

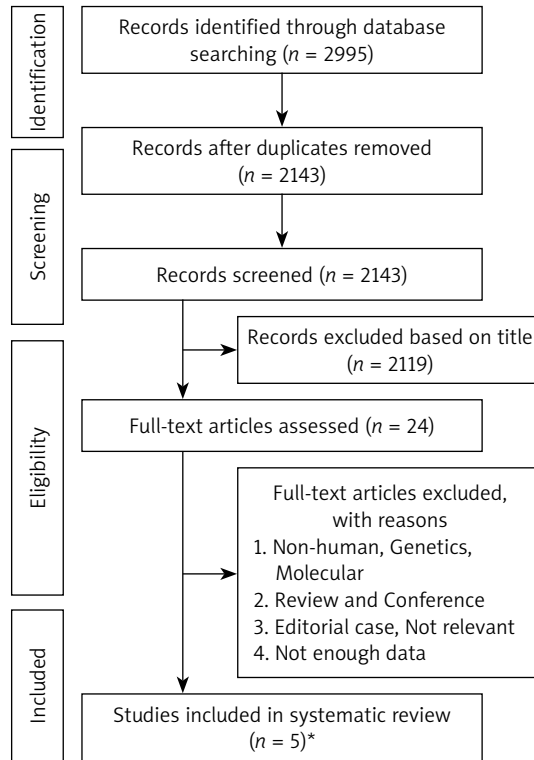

**Supplementary Figure S1.** Flow chart diagram of study selection

\*The 6<sup>th</sup> study included in the systematic review is based on the results of the current NHANES analysis.

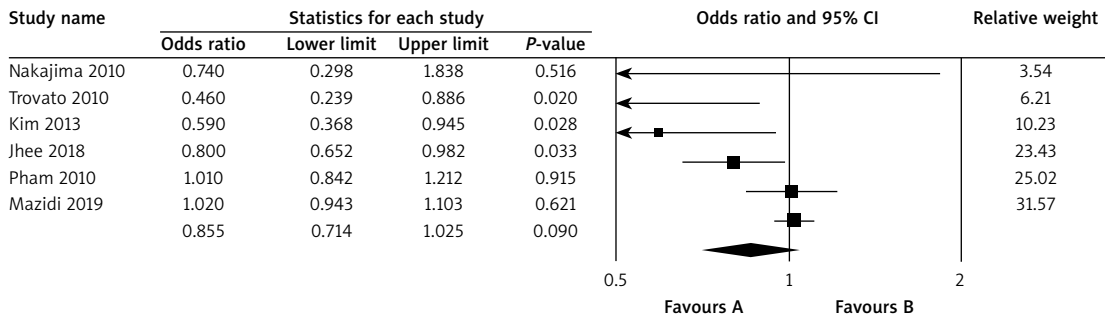

**Supplementary Figure S2.** Forest plot of coffee consumption and chronic kidney disease
